# Supplementary material for: Study of a phosphorescent cationic iridium(iii) complex displaying a blue-shift in crystals
Source: Royal Society of Chemistry journal article supplement (doi:10.1039/d1cp03341g), 2021-01-01
Supplement: d1cp03341g1.pdf [file d1cp03341g1.pdf]

## Supplementary information file for the article: Study of a phosphorescent cationic iridium(III) complex displaying blue shift in crystals

Emiliano Martínez-Vollbert,<sup>a</sup> Christian Philouze,<sup>a</sup> Isabelle Gautier-Luneau,<sup>b</sup> Yohann Moreau,<sup>c</sup> Pierre-Henri Lanoë,<sup>a\*</sup> and Frédérique Loiseau<sup>a\*</sup>

<sup>a</sup> Univ. Grenoble Alpes, CNRS, DCM, 38000 Grenoble, France

<sup>b</sup> Univ. Grenoble Alpes, CNRS, Grenoble INP, Institut Néel, 38000 Grenoble, France

<sup>c</sup> Univ. Grenoble Alpes, CEA, CNRS, IRIG, CBM, F-38000 Grenoble, France

\* Correspondence pierre-henri.lanoë@univ-grenoble-alpes.fr ; Frederique.loiseau@univ-grenoble-alpes.fr

### Table of contents

|                                                                                                                                                                                                                                                                                                                                                                                                                              |    |
|------------------------------------------------------------------------------------------------------------------------------------------------------------------------------------------------------------------------------------------------------------------------------------------------------------------------------------------------------------------------------------------------------------------------------|----|
| General considerations .....                                                                                                                                                                                                                                                                                                                                                                                                 | 2  |
| Crystal Structure Determinations and Refinements.....                                                                                                                                                                                                                                                                                                                                                                        | 2  |
| Synthesis.....                                                                                                                                                                                                                                                                                                                                                                                                               | 4  |
| TD-DFT calculation of the absorption spectrum of complex A, singlet ground state, optimized in CH <sub>2</sub> Cl <sub>2</sub> . .....                                                                                                                                                                                                                                                                                       | 10 |
| DFT calculation on orbitals localization for the radiative transition T <sub>1</sub> → S <sub>0</sub> .....                                                                                                                                                                                                                                                                                                                  | 14 |
| Figure S 1: Views (from top to bottom: projection in bc, ac, and ab planes) of the crystal packing with the counter ions in space filling. Hydrogens atoms have been omitted for clarity.....                                                                                                                                                                                                                                | 6  |
| Figure S 2: Packing of the molecules in ball and sticks, along the a axis. Hydrogens atoms have been omitted for clarity. ....                                                                                                                                                                                                                                                                                               | 7  |
| Figure S 3: Projection of the chains in ab plane .....                                                                                                                                                                                                                                                                                                                                                                       | 7  |
| Figure S 4: View of the chains along the direction ac.....                                                                                                                                                                                                                                                                                                                                                                   | 8  |
| Figure S 5: Intracatenar Hydrogen bond between the H22 atoms and the C11-C12 carbon bond.....                                                                                                                                                                                                                                                                                                                                | 8  |
| Figure S 6: Intramolecular interaction between the hydrogen atom H9 and the nitrogen atom N3.....                                                                                                                                                                                                                                                                                                                            | 9  |
| Figure S 7: Powder X-ray diffraction diagram of crystals (black) registered at room temperature compared to calculated pattern from crystal structure (200 K) (red).....                                                                                                                                                                                                                                                     | 9  |
| Figure S 8: Luminescence decays. ....                                                                                                                                                                                                                                                                                                                                                                                        | 10 |
| Figure S 9: Reconstructed UV-Vis absorption spectrum for complex A only, in chloromethane (right scale: Molar absorbance computed as detailed in <a href="https://gaussian.com/uvvisplot/">https://gaussian.com/uvvisplot/</a> ), together with computed peaks (left scale, arbitrary units for oscillator strength). Results from TD-DFT calculations, MN15/Def2SVP, CH <sub>2</sub> Cl <sub>2</sub> implicit solvent. .... | 12 |
| Figure S 10: Natural transition Orbitals (Hole/Electron) for the four lowest energetic transitions. TD-DFT MN15/Def2-SVP, implicit solvent model for CH <sub>2</sub> Cl <sub>2</sub> . ....                                                                                                                                                                                                                                  | 13 |
| Figure S 11: Frontier orbitals of Complex A in vacuum: SOMO's of the triplet state (left) and HOMO/LUMO of the singlet state (right). ....                                                                                                                                                                                                                                                                                   | 15 |
| Figure S 12: Frontier orbitals of Complex A in CH <sub>3</sub> Cl <sub>2</sub> : SOMO's of the triplet state (left) and HOMO/LUMO of the singlet state (right). ....                                                                                                                                                                                                                                                         | 16 |
| Figure S 13: Frontier orbitals of Complex A in the crystal: SOMO's of the triplet state (left) and HOMO/LUMO of the singlet state(right). ....                                                                                                                                                                                                                                                                               | 17 |
| Figure S 14: <sup>1</sup> H NMR spectra of the cyclometallating ligand 400 MHz in CDCl <sub>3</sub> .....                                                                                                                                                                                                                                                                                                                    | 18 |
| Figure S 15: <sup>13</sup> C NMR spectra of the cyclometallating ligand 101 MHz in CDCl <sub>3</sub> .....                                                                                                                                                                                                                                                                                                                   | 18 |
| Figure S 16: <sup>1</sup> H NMR spectra of complex A 500 MHz in CD <sub>2</sub> Cl <sub>2</sub> .....                                                                                                                                                                                                                                                                                                                        | 19 |
| Figure S 17: <sup>13</sup> C NMR spectra of complex A, 126 MHz in CD <sub>2</sub> Cl <sub>2</sub> .....                                                                                                                                                                                                                                                                                                                      | 19 |
| Figure S 18 : <sup>19</sup> F NMR spectra of complex A 470 MHz in CD <sub>2</sub> Cl <sub>2</sub> .....                                                                                                                                                                                                                                                                                                                      | 20 |

**General considerations**

Commercially available reagents were purchased from Sigma-Aldrich®, Alfa Aesar®, Acros Organics®, TCI Chemical®, Merck®, Strem® or Fluorochem® and used as received unless otherwise specified. Solvents were obtained from same commercial sources and used without further purification. For moisture sensitive reactions, glassware was oven-dried prior to use. <sup>1</sup>H NMR spectra were recorded on a 400 MHz and on a 500 MHz in deuterated solvent (CDCl<sub>3</sub>, DMSO-d<sub>6</sub> or CD<sub>2</sub>Cl<sub>2</sub>) and data are reported as follows: chemical shift in ppm from tetramethylsilane with solvent as an internal indicator (CDCl<sub>3</sub> 7.26 ppm, dmsO-d<sub>6</sub> 2.50 ppm, CD<sub>2</sub>Cl<sub>2</sub> 5.32 ppm), multiplicity (s = singlet, d = doublet, t = triplet, q = quartet, p = pentet, m = multiplet or overlap of non-equivalent resonances), integration. <sup>13</sup>C{<sup>1</sup>H} NMR spectra were recorded either at 101 MHz or at 126 MHz in suitable deuterated solvent and data are reported as follows: chemical shift in ppm from tetramethylsilane with the solvent as an internal indicator (CDCl<sub>3</sub> 77.16 ppm, DMSO-d<sub>6</sub> 39.52 ppm, CD<sub>2</sub>Cl<sub>2</sub> 53.84 ppm). <sup>19</sup>F{<sup>1</sup>H} NMR spectra were recorded at 376 MHz and at 470 MHz in the suitable deuterated solvent.

**Crystal Structure Determinations and Refinements.**

An orange plate crystal (0.13 x 0.15 x 0,30 mm) was picked up, coated with a paraffin mixture and mounted with a nylon loop and centered on a Bruker-Nonius diffractometer equipped with an Incoatec high brilliance microsource with multilayers mirrors monochromatized Mo(Kα) radiation (λ = 0.71073 Å) and an APEX II detector. Data collection was made at 200 K with an Oxford Cryosystem cryostream cooler. Final cell parameters were obtained post-refining the whole data. The collected reflections were corrected for Lorentz and polarization effects (EVAL14) and for absorption (SADABS). The resulting data was merged using XPREP. Crystals and data collection details are given in Table S1. Using the OLEX 2<sup>1</sup> analysis package, the crystal structural solution was solved by charge flipping method (Superflip) and refinement was done by full-matrix least squares on F<sup>2</sup> (SHELX2013). C, N, O, F, P, Cl, and Ir atoms were refined anisotropically. H atoms were set geometrically, riding on the carrier atoms, with isotropic thermal parameters. PF<sub>6</sub> anion and dichloroethane molecules displayed disorders which were treated using different positions with partial occupancy rates and restraints.

Table S 1: Crystal data and structure refinement for [Ir(phbzOMe<sub>2</sub>)<sub>2</sub>(dmp)PF<sub>6</sub>].

|                                    |                                                                                                                                         |
|------------------------------------|-----------------------------------------------------------------------------------------------------------------------------------------|
|                                    | [Ir(phbzOMe <sub>2</sub> ) <sub>2</sub> (dmp)PF <sub>6</sub> ]                                                                          |
| Empirical formula                  | C <sub>48</sub> H <sub>50</sub> Ir N <sub>6</sub> O <sub>4</sub> , P F <sub>6</sub> , 3(C <sub>2</sub> H <sub>4</sub> Cl <sub>2</sub> ) |
| Formula weight/g.mol <sup>-1</sup> | 1408.96                                                                                                                                 |
| Morphology                         | plate                                                                                                                                   |
| Colour                             | orange                                                                                                                                  |
| Crystal size/mm                    | 0.13 x 0.15 x 0.30                                                                                                                      |
| Crystal system                     | monoclinic                                                                                                                              |
| Space group                        | C2/c                                                                                                                                    |
| Temperature/K                      | 200                                                                                                                                     |

|                                            |                                          |
|--------------------------------------------|------------------------------------------|
| a/Å                                        | 19.554(4)                                |
| b/Å                                        | 22.055(4)                                |
| c/Å                                        | 15.394(3)                                |
| α/°                                        | 90                                       |
| β/°                                        | 117.07(3)                                |
| γ/°                                        | 90                                       |
| Volume/Å <sup>3</sup>                      | 5911(2)                                  |
| Z                                          | 4                                        |
| ρ <sub>calc</sub> /g.cm <sup>-3</sup>      | 1.583                                    |
| μ/mm <sup>-1</sup>                         | 2.625                                    |
| F(000)                                     | 2832                                     |
| Radiation/Å                                | MoKα (λ = 0.71073)                       |
| Θ range for data collection/°              | 2.809 to 30.000                          |
| Index ranges                               | -27 ≤ h ≤ 27, -30 ≤ k ≤ 31, -21 ≤ l ≤ 21 |
| Total reflections                          | 41641                                    |
| Unique reflections                         | 8603                                     |
| Observed reflections                       | 3224(F <sup>2</sup> > 2σ)                |
| R <sub>int</sub>                           | 0.0351                                   |
| Data/restraints/parameters                 | 8603/175/424                             |
| Goodness-of-fit on F <sup>2</sup>          | 1.167                                    |
| Final R indexes [I ≥ 2σ (I)]               | R1 = 0.0265, wR2 <sup>a</sup> = 0.0644   |
| Final R indexes [all data]                 | R1 = 0.0362, wR2 <sup>a</sup> = 0.0742   |
| Largest diff. peak/hole /e.Å <sup>-3</sup> | 2.163/-1.139                             |

<sup>a</sup> Refinement based on F<sup>2</sup> with  $w = 1/[\sigma^2(F_o)^2 + (0.0278p)^2 + 12.8951p]$  where  $p = (F_o^2 + 2F_c^2)/3$

## Synthesis

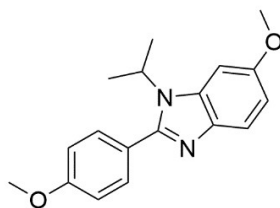

### Ligand synthesis

5-methoxy-*N*-(1-methylethyl)-2-nitrobenzenamine (50 mg, 2.4 mmol) and 4-methoxybenzaldehyde (325 mg, 2.4 mmol) were dissolved in a mixture of 2-ethoxyethanol-water 3:1 and heated until dissolution. Na<sub>2</sub>S<sub>2</sub>O<sub>4</sub> (1.25 g, 7.2 mmol) was added to the mixture and refluxed overnight. The reaction mixture was cooled to r. t. and the product extracted with dichloromethane and purified over SiO<sub>2</sub> dichloromethane/pentane (9:1). The title compound was isolated as a white powder (324 mg, 57%).

<sup>1</sup>H NMR (400 MHz, CDCl<sub>3</sub>) δ 7.68 (d, *J* = 8.8 Hz, 1H), 7.56 (d, *J* = 8.8 Hz, 1H), 7.07 (d, *J* = 2.3 Hz, 1H), 7.02 (d, *J* = 8.8 Hz, 1H), 6.92 (dd, *J* = 8.8, 2.3 Hz, 1H), 4.78 (hept, *J* = 7.0 Hz, 1H), 3.89 (d, *J* = 9.2 Hz, 6H), 1.62 (d, *J* = 7.0 Hz, 6H). <sup>13</sup>C NMR (101 MHz, CDCl<sub>3</sub>) δ 160.7, 155.9, 153.20, 138.6, 134.2, 130.9, 123.5, 120.5, 114.2, 110.4, 96.9, 56.2, 55.5, 48.7, 21.3. LR-MS (ESI) calcd. for C<sub>18</sub>H<sub>21</sub>N<sub>2</sub>O<sub>2</sub> [M+H]<sup>+</sup> 297.38 found 297.07. Elementary analysis calcd. for C<sub>18</sub>H<sub>21</sub>N<sub>2</sub>O<sub>2</sub> C, 72.95; H, 6.80; N, 9.45; found C, 72.70; H, 6.69; N, 9.36.

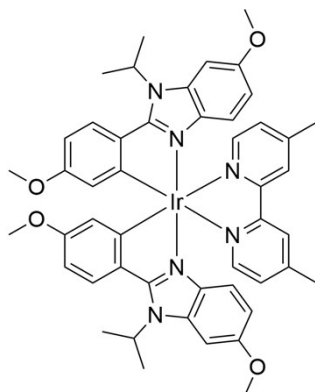

### Complex A

Following the method first published by Nonoyama,<sup>2</sup> from the ligand, the chloro-bridged Ir(III) dimer was synthesized and used without further purification using IrCl<sub>3</sub>·xH<sub>2</sub>O (60 mg, 0.2 mmol) and 6-methoxy-2-(4-methoxyphenyl)-1-(1-methylethyl)-1*H*-benzimidazole (125 mg, 0.4 mmol) obtaining a yellowish powder (90 mg, 55%). The chloro-bridged dimer (90 g, 0.1 mmol) and 4,4'-dimethyl-2,2'-dipyridyl (20 mg, 0.1 mmol) were dissolved in a mixture CH<sub>2</sub>Cl<sub>2</sub>-MeOH 1:1 and refluxed overnight. The mixture was cooled to r. t. and reduced to ¼ of the volume, a saturated solution of KPF<sub>6(ac)</sub> was added until precipitation. The precipitated was filtrated and purified over SiO<sub>2</sub> CH<sub>2</sub>Cl<sub>2</sub>/acetone (9:1). Complex A was isolated as an orange powder (81 mg, 67%). The complex was crystalized by slow vapor diffusion using as solvent 1,2-dichloroethane

and non-solvent diisopropylether obtaining dark orange crystals displaying a green-yellow emission under UV light.

$^1\text{H}$  NMR (500 MHz,  $\text{CD}_2\text{Cl}_2$ )  $\delta$  8.20 (s, 1H), 7.92 (d,  $J = 5.6$  Hz, 1H), 7.74 (d,  $J = 8.8$  Hz, 1H), 7.25 (dd,  $J = 5.6, 0.9$  Hz, 1H), 7.08 (d,  $J = 2.3$  Hz, 1H), 6.63 (dd,  $J = 8.8, 2.7$  Hz, 1H), 6.54 (dd,  $J = 9.0, 2.3$  Hz, 1H), 5.78 (d,  $J = 2.6$  Hz, 1H), 3.43 (s, 1H), 2.59 (s, 1H).  
 $^{13}\text{C}$  NMR (100 MHz,  $\text{CD}_2\text{Cl}_2$ )  $\delta$  163.0, 161.1, 156.9, 156.5, 115.2, 112.4, 108.3, 98.5, 133.9, -137.4, -140.9, -144.1.  
HRMS (ESI) calcd  $m/z$  965.3412. Found: 965.3412.  
Analysis calcd for  $\text{C}_{48}\text{H}_{50}\text{F}_6\text{I}$ : C, 67.75%; H, 5.75%.

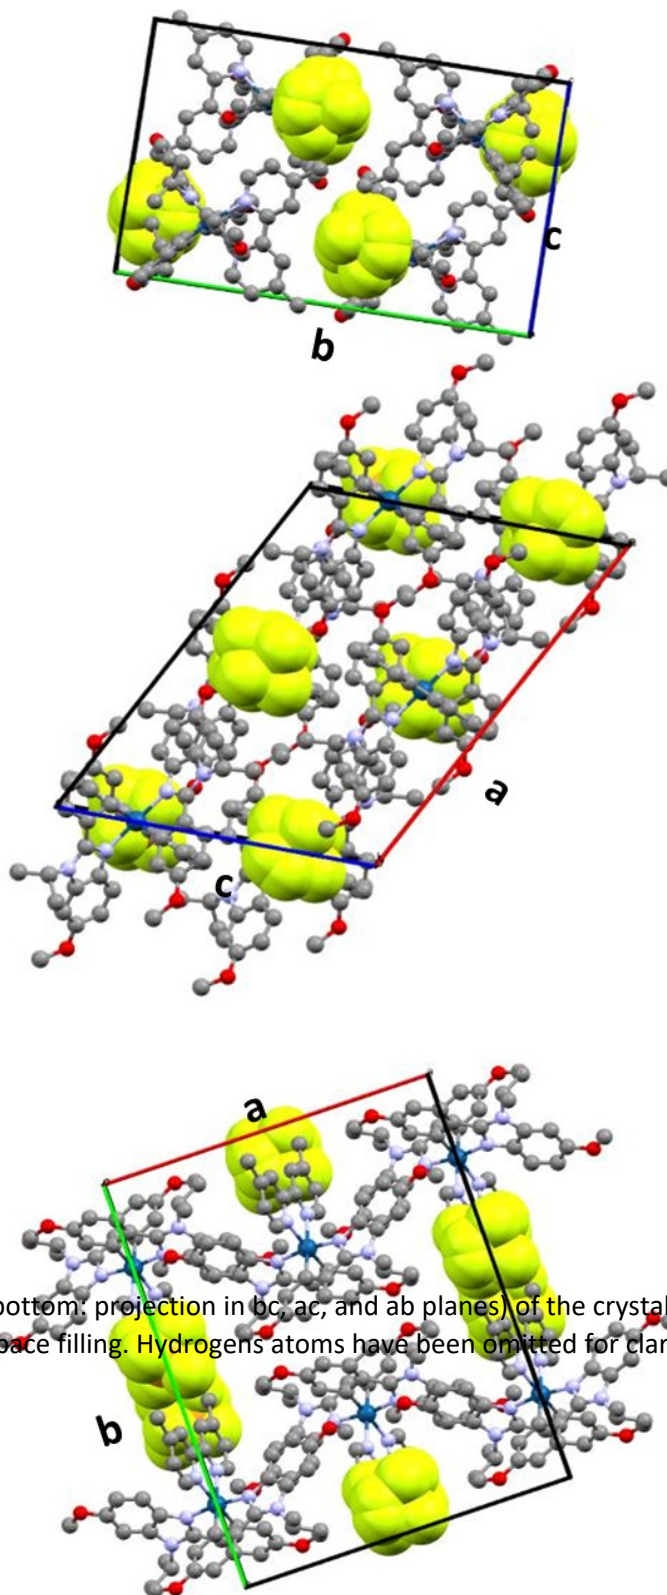

Figure S 1: Views (from top to bottom: projection in bc, ac, and ab planes) of the crystal packing with the counter ions in space filling. Hydrogens atoms have been omitted for clarity.

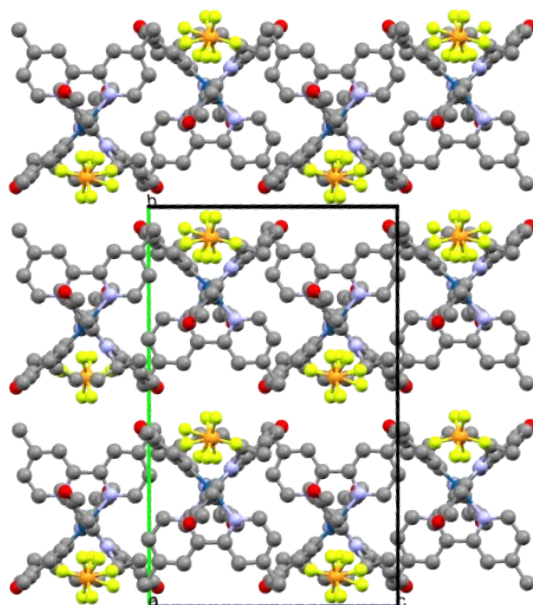

Figure S 2: Packing of the molecules in ball and sticks, along the a axis. Hydrogens atoms have been omitted for clarity.

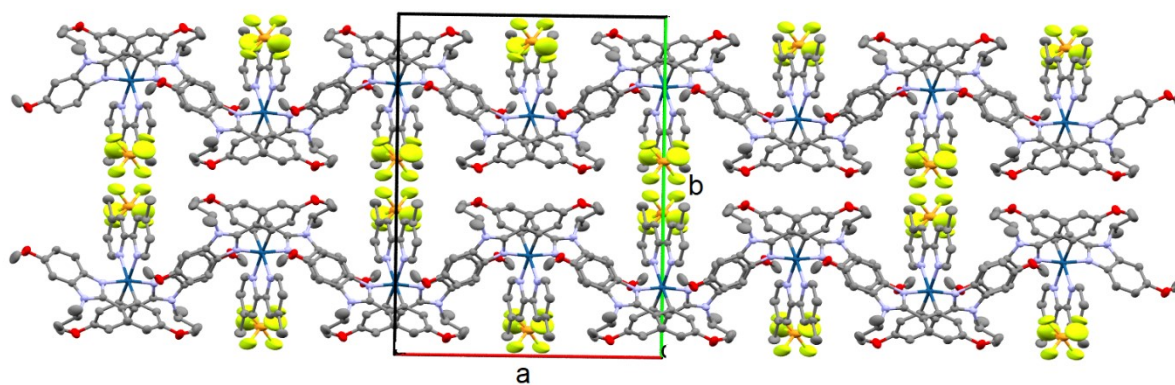

Figure S 3: Projection of the chains in ab plane

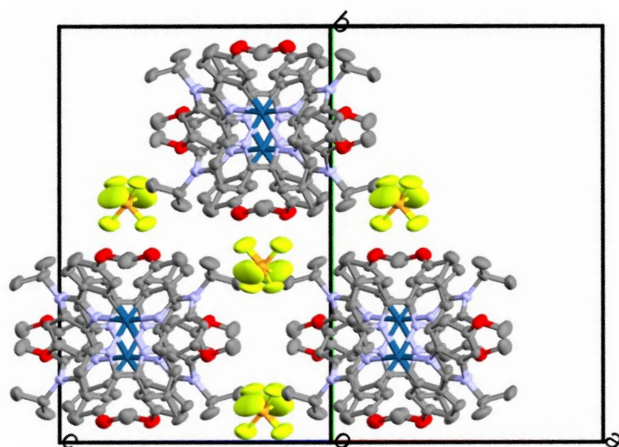

Figure S 4: View of the chains along the direction *ac*.

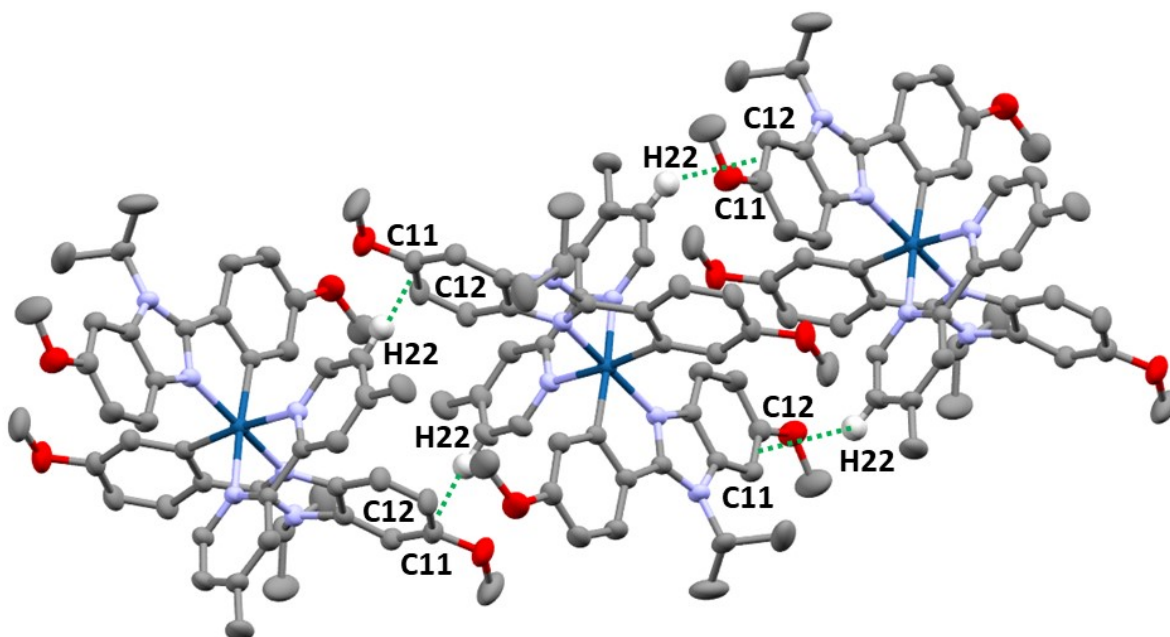

Figure S 5: Intracatenar Hydrogen bond between the H22 atoms and the C11-C12 carbon bond.

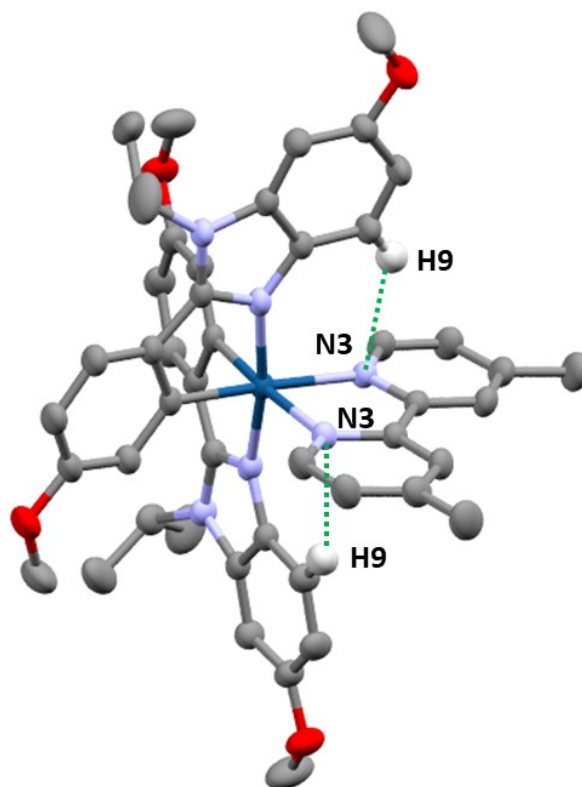

Figure S 6: Intramolecular interaction between the hydrogen atom H9 and the nitrogen atom N3.

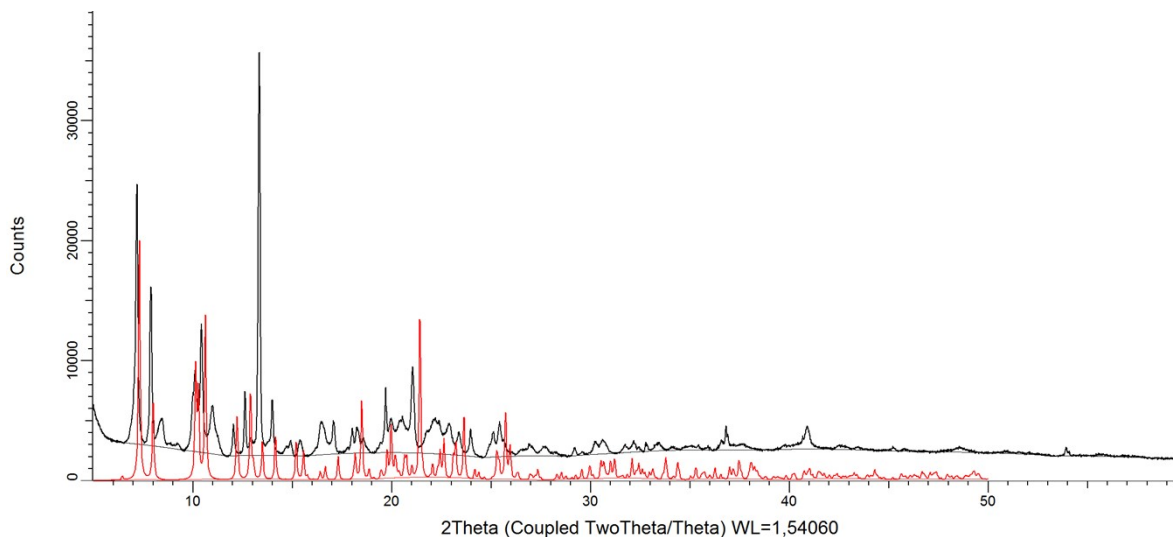

Figure S 7: Powder X-ray diffraction diagram of crystals (black) registered at room temperature compared to calculated pattern from crystal structure (200 K) (red).

The experimental pattern of crystals (collected indiscriminately from the same batch of crystallization) is similar to calculated one from the crystal structure. The shift of the peaks is due to the measurement realized at different temperatures. Furthermore, PXRD pattern of no grinded crystals shows different intensities due to preferential orientations (002 peak at 2 theta angles = 12.5° for example) and also some additional peaks (with a broadening of the peak at full width at half maximum) probably due to degraded crystals with loss of crystallization solvent. Effectively some unbright crystals are observed under optical microscope. The contribution of this degraded phase is minor.



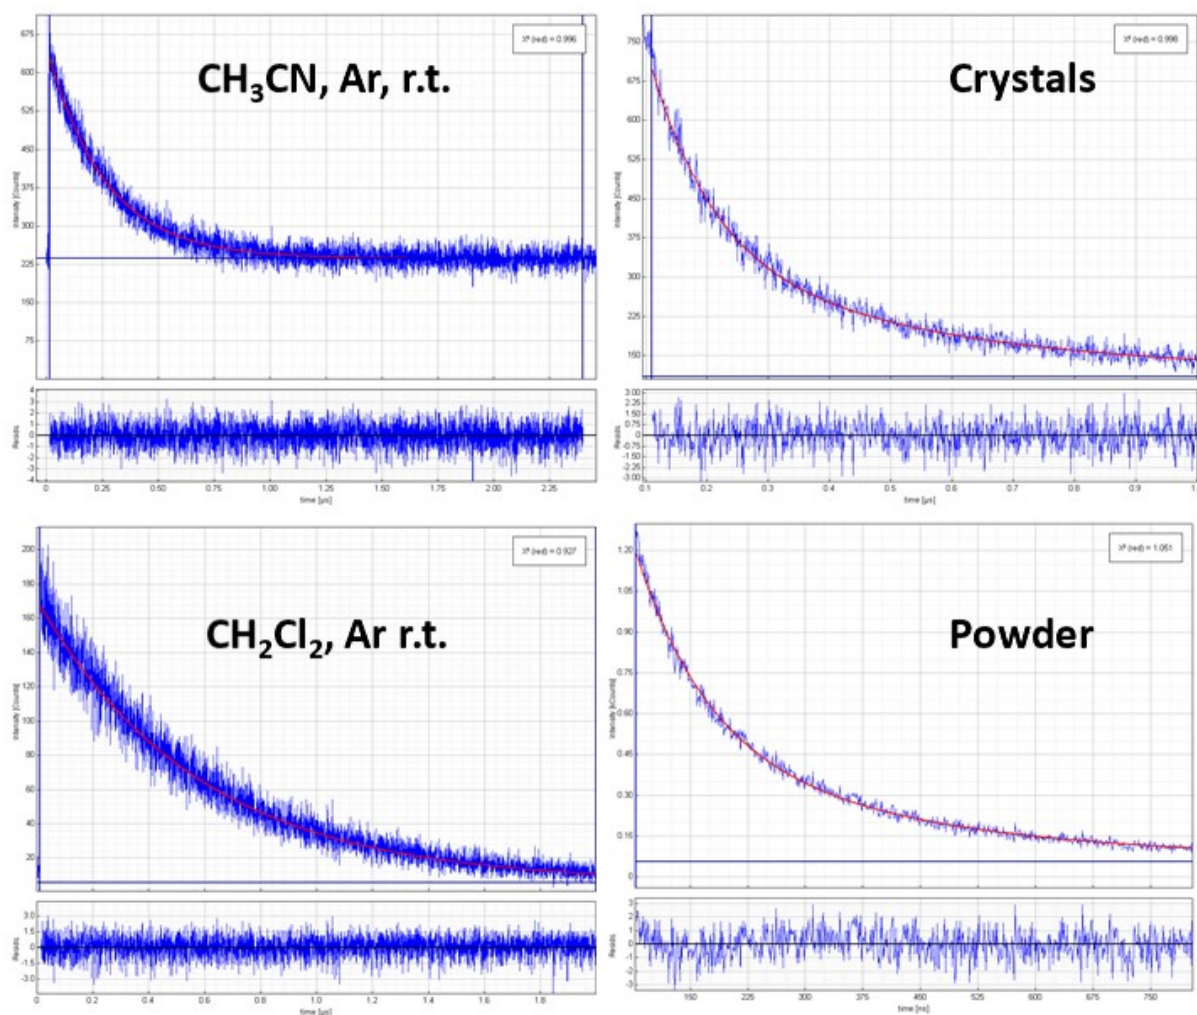

Figure S 8: Luminescence decays.

TD-DFT calculation of the absorption spectrum of complex A, singlet ground state, optimized in  $\text{CH}_2\text{Cl}_2$ .

Table S 2: 20 first absorptions of Complex A in  $\text{CH}_2\text{Cl}_2$ , singlet state, with DE (eV), corresponding  $\lambda$  (nm), oscillator strength (noted f) and composition. Orbital nb 214 being the HOMO, and 215 the LUMO.

| Transition nb | $\Delta E$ (eV) | $\lambda$ (nm) | Oscillator strength <i>f</i> | Composition (occupied OM nb to virtual OM nb, with weight) |
|---------------|-----------------|----------------|------------------------------|------------------------------------------------------------|
| 1             | 3.1018          | 399.71         | 0.0004                       | 210 -> 215 0.18286                                         |
|               |                 |                |                              | 212 -> 215 0.14841                                         |
|               |                 |                |                              | 214 -> 215 0.65573                                         |
| 2             | 3.2244          | 384.52         | 0.0422                       | 211 -> 215 0.19100                                         |
|               |                 |                |                              | 213 -> 215 0.67058                                         |
| 3             | 3.5521          | 349.04         | 0.0002                       | 208 -> 215 -0.17532                                        |
|               |                 |                |                              | 210 -> 215 -0.30279                                        |
|               |                 |                |                              | 212 -> 215 0.59149                                         |
| 4             | 3.6897          | 336.02         | 0.5437                       | 213 -> 218 0.31693                                         |
|               |                 |                |                              | 214 -> 216 0.55982                                         |

|           |        |        |        |                                                                                                                                                        |                                                                                                                           |
|-----------|--------|--------|--------|--------------------------------------------------------------------------------------------------------------------------------------------------------|---------------------------------------------------------------------------------------------------------------------------|
|           |        |        |        | 214 -> 217                                                                                                                                             | -0.16502                                                                                                                  |
| <b>5</b>  | 3.7300 | 332.39 | 0.0781 | 213 -> 216<br>213 -> 217<br>214 -> 218<br>214 -> 219                                                                                                   | 0.44088<br>-0.12600<br>0.48071<br>0.10587                                                                                 |
| <b>6</b>  | 3.8776 | 319.74 | 0.0006 | 206 -> 215<br>208 -> 215<br>210 -> 215<br>212 -> 215<br>214 -> 215                                                                                     | 0.10642<br>0.15224<br>0.53154<br>0.31184<br>-0.25173                                                                      |
| <b>7</b>  | 3.9234 | 316.02 | 0.1229 | 205 -> 215<br>209 -> 215<br>211 -> 215<br>213 -> 215<br>213 -> 216                                                                                     | 0.12515<br>0.15792<br>0.61351<br>-0.21140<br>0.10793                                                                      |
| <b>8</b>  | 4.0795 | 303.92 | 0.0615 | 211 -> 218<br>212 -> 216<br>213 -> 218<br>213 -> 221<br>214 -> 216                                                                                     | 0.19134<br>-0.16182<br>0.49810<br>-0.12999<br>-0.26707                                                                    |
| <b>9</b>  | 4.0857 | 303.46 | 0.0269 | 210 -> 218<br>211 -> 216<br>212 -> 218<br>213 -> 216<br>214 -> 218                                                                                     | -0.14197<br>0.13447<br>-0.14769<br>0.47917<br>-0.39936                                                                    |
| <b>10</b> | 4.1737 | 297.06 | 0.0007 | 210 -> 215<br>210 -> 217<br>212 -> 217<br>214 -> 216<br>214 -> 217                                                                                     | -0.10307<br>0.14009<br>0.12400<br>0.19186<br>0.62518                                                                      |
| <b>11</b> | 4.2660 | 290.64 | 0.0181 | 211 -> 217<br>213 -> 217<br>214 -> 219                                                                                                                 | 0.14238<br>0.65453<br>0.11218                                                                                             |
| <b>12</b> | 4.3730 | 283.52 | 0.0590 | 208 -> 216<br>210 -> 216<br>212 -> 216<br>212 -> 217                                                                                                   | -0.16703<br>-0.20159<br>0.57106<br>-0.13516                                                                               |
| <b>13</b> | 4.4018 | 281.67 | 0.0004 | 208 -> 218<br>210 -> 218<br>210 -> 219<br>210 -> 221<br>210 -> 227<br>212 -> 218<br>213 -> 217<br>214 -> 218<br>214 -> 219<br>214 -> 221               | 0.12217<br>0.22326<br>0.15789<br>-0.11723<br>-0.13982<br>-0.25945<br>-0.11410<br>-0.10743<br>0.36715<br>-0.14359          |
| <b>14</b> | 4.4219 | 280.39 | 0.1211 | 204 -> 215<br>206 -> 215<br>210 -> 216<br>211 -> 218<br>211 -> 219<br>211 -> 221<br>211 -> 227<br>212 -> 216<br>213 -> 218<br>213 -> 219<br>213 -> 221 | 0.28493<br>0.14741<br>0.15072<br>0.15724<br>0.17997<br>-0.12327<br>-0.11596<br>0.11729<br>-0.21822<br>0.30746<br>-0.15054 |
| <b>15</b> | 4.4409 | 279.19 | 0.0004 | 203 -> 215<br>209 -> 215<br>210 -> 218<br>211 -> 216<br>212 -> 218<br>212 -> 219<br>214 -> 219                                                         | -0.11402<br>0.28162<br>-0.20198<br>-0.13764<br>0.20295<br>0.17956<br>0.41607                                              |
| <b>16</b> | 4.4870 | 276.32 | 0.4318 | 204 -> 215<br>206 -> 215<br>209 -> 218<br>210 -> 216<br>210 -> 217                                                                                     | 0.24010<br>0.15389<br>-0.10272<br>-0.26090<br>0.13661                                                                     |

|           |        |        |        |                                                                                                                                                                                                         |
|-----------|--------|--------|--------|---------------------------------------------------------------------------------------------------------------------------------------------------------------------------------------------------------|
|           |        |        |        | 211 -> 218 -0.27061<br>212 -> 217 -0.12228<br>213 -> 219 0.29179<br>213 -> 221 0.10935                                                                                                                  |
| <b>17</b> | 4.4917 | 276.03 | 0.0327 | 203 -> 215 -0.19355<br>205 -> 215 0.12910<br>207 -> 215 0.13989<br>209 -> 215 0.44120<br>211 -> 215 -0.15546<br>211 -> 216 -0.10387<br>212 -> 218 -0.25468<br>214 -> 218 0.10196<br>214 -> 219 -0.24566 |
| <b>18</b> | 4.5196 | 274.33 | 0.0414 | 209 -> 215 0.21988<br>209 -> 216 0.17059<br>210 -> 218 0.19087<br>211 -> 216 0.33482<br>212 -> 218 0.34394<br>213 -> 220 -0.13771<br>214 -> 219 -0.17660                                                |
| <b>19</b> | 4.5620 | 271.77 | 0.1574 | 204 -> 215 -0.34722<br>206 -> 215 -0.19862<br>210 -> 216 -0.20835<br>210 -> 217 -0.13517<br>212 -> 217 0.13630<br>213 -> 218 -0.15964<br>213 -> 219 0.41402                                             |
| <b>20</b> | 4.6231 | 268.18 | 0.0279 | 204 -> 215 -0.10605<br>206 -> 215 0.11772<br>208 -> 215 0.60437<br>210 -> 215 -0.24779                                                                                                                  |

## Reconstructed UV-Vis spectrum and computed peaks

TD-DFT MN15/Def-2SVP, implicit  $\text{CH}_2\text{Cl}_2$

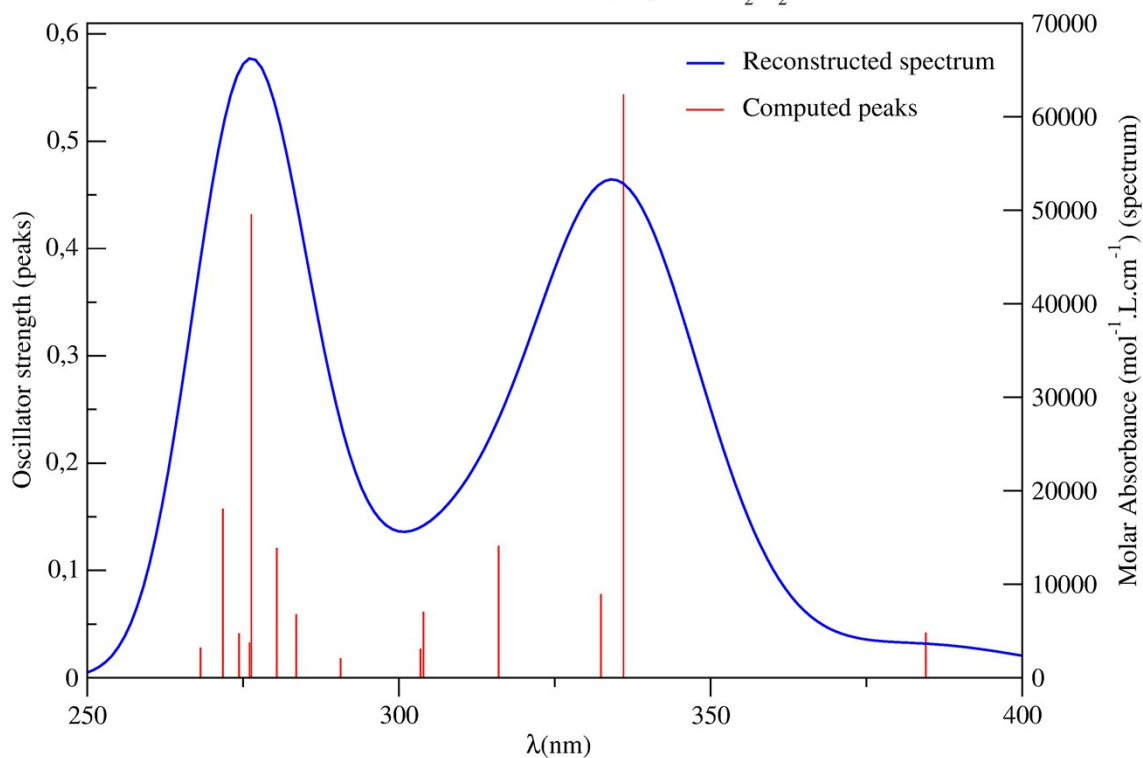

Figure S 9: Reconstructed UV-Vis absorption spectrum for complex A only, in chloromethane (right scale: Molar absorbance computed as detailed in <https://gaussian.com/uvvisplot/>), together with computed peaks (left scale, arbitrary units for oscillator strength). Results from TD-DFT calculations, MN15/Def2SVP,  $\text{CH}_2\text{Cl}_2$  implicit solvent.

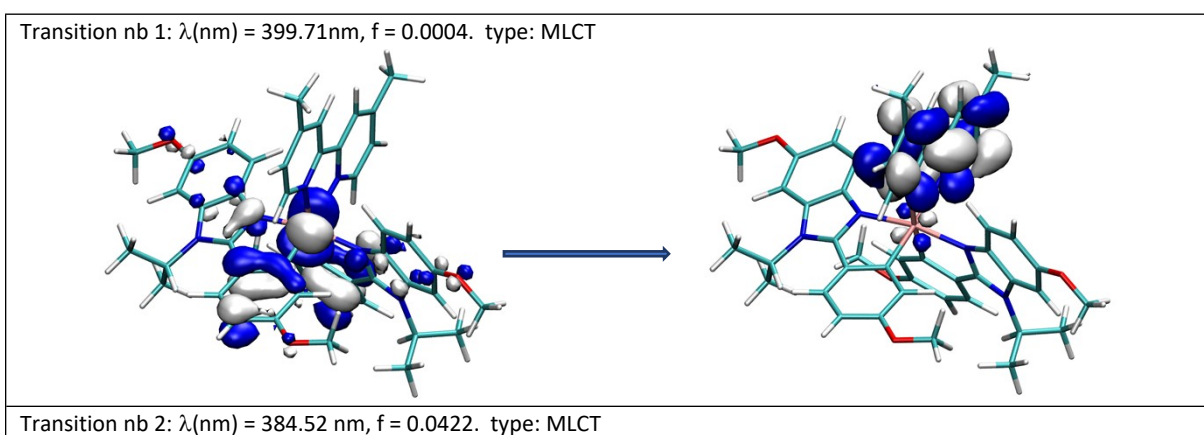

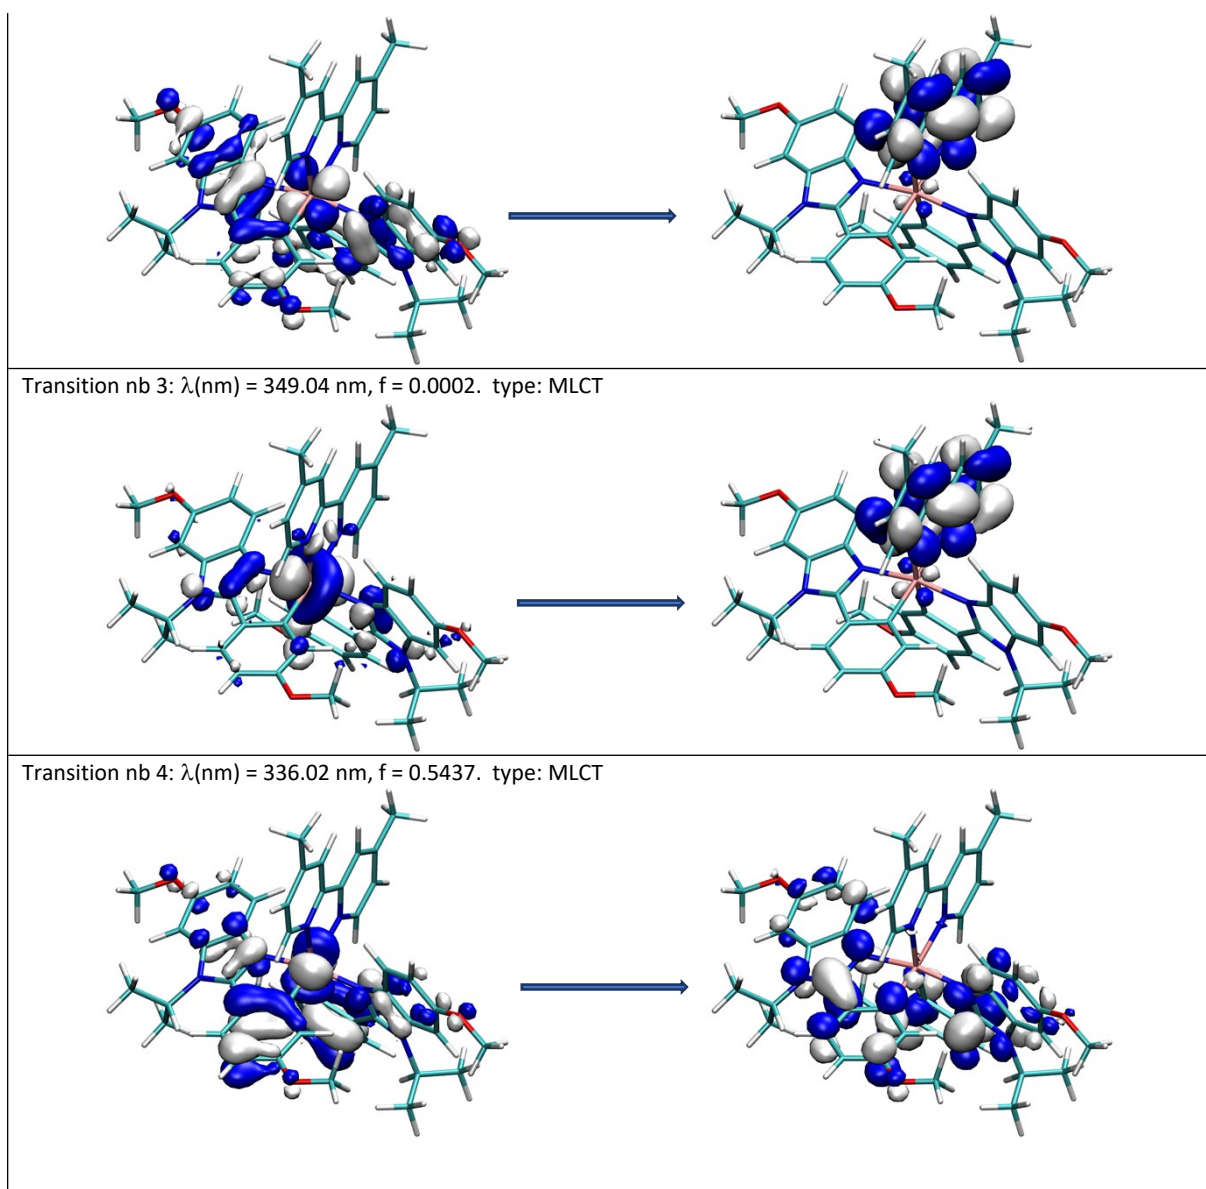

Figure S 10: Natural transition Orbitals (Hole/Electron) for the four lowest energetic transitions. TD-DFT MN15/Def2-SVP, implicit solvent model for  $\text{CH}_2\text{Cl}_2$ .

#### DFT calculation on orbitals localization for the radiative transition $T_1 \rightarrow S_0$

Kohn-Sham orbitals represented hereafter represent the singly occupied molecular orbitals (SOMO 1 and 2) in the triplet state vs the HOMO and LUMO in the singlet state for the three cases: in vacuum, with an implicit solvent model for  $\text{CH}_2\text{Cl}_2$  and embedded in the model of crystal. For each situation, the optimized geometry of the triplet in the specific condition is used for both triplet and singlet configurations, consistently with the view of a vertical  $T \rightarrow S$  transition.

In the three cases, the emission can be seen as a deexcitation of the electron described by the SOMO 2 orbital of the triplet, located on the dimethylbipyridine (dmp) towards the HOMO of the singlet, delocalized between the metal and the 2-phenylbenzimidazole ligands (pbi)

It is noteworthy that while the SOMO-1 and the HOMO are evenly distributed on the two 2-phenylbenzimidazole ligands in vacuum, it tends to become dissymmetric in solvent and in crystal, with a complete relocalization in some cases. That behavior is consistent with a polarization due to the environment in the two latter cases.

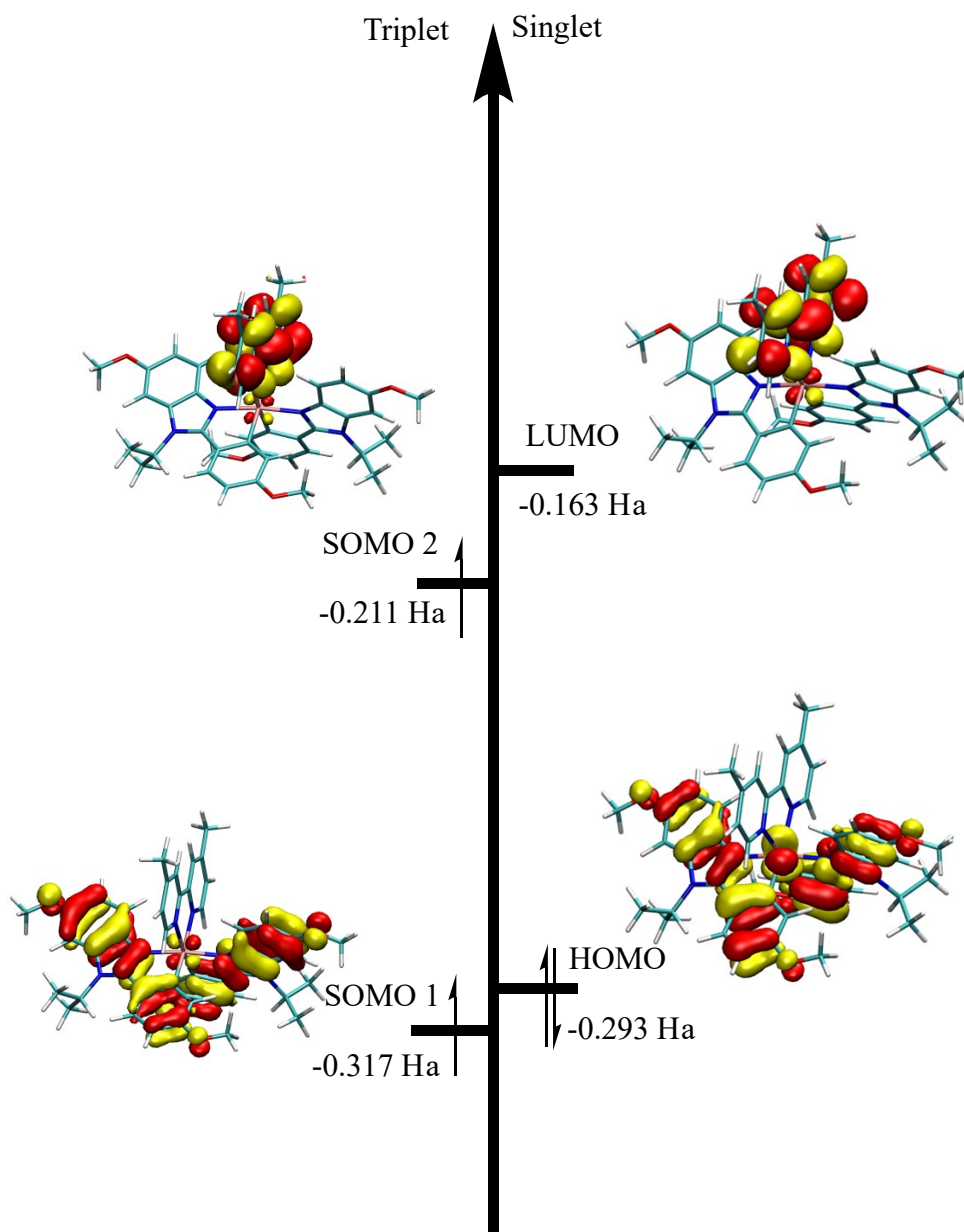

Figure S 11: Frontier orbitals of Complex A in vacuum: SOMO's of the triplet state (left) and HOMO/LUMO of the singlet state (right).

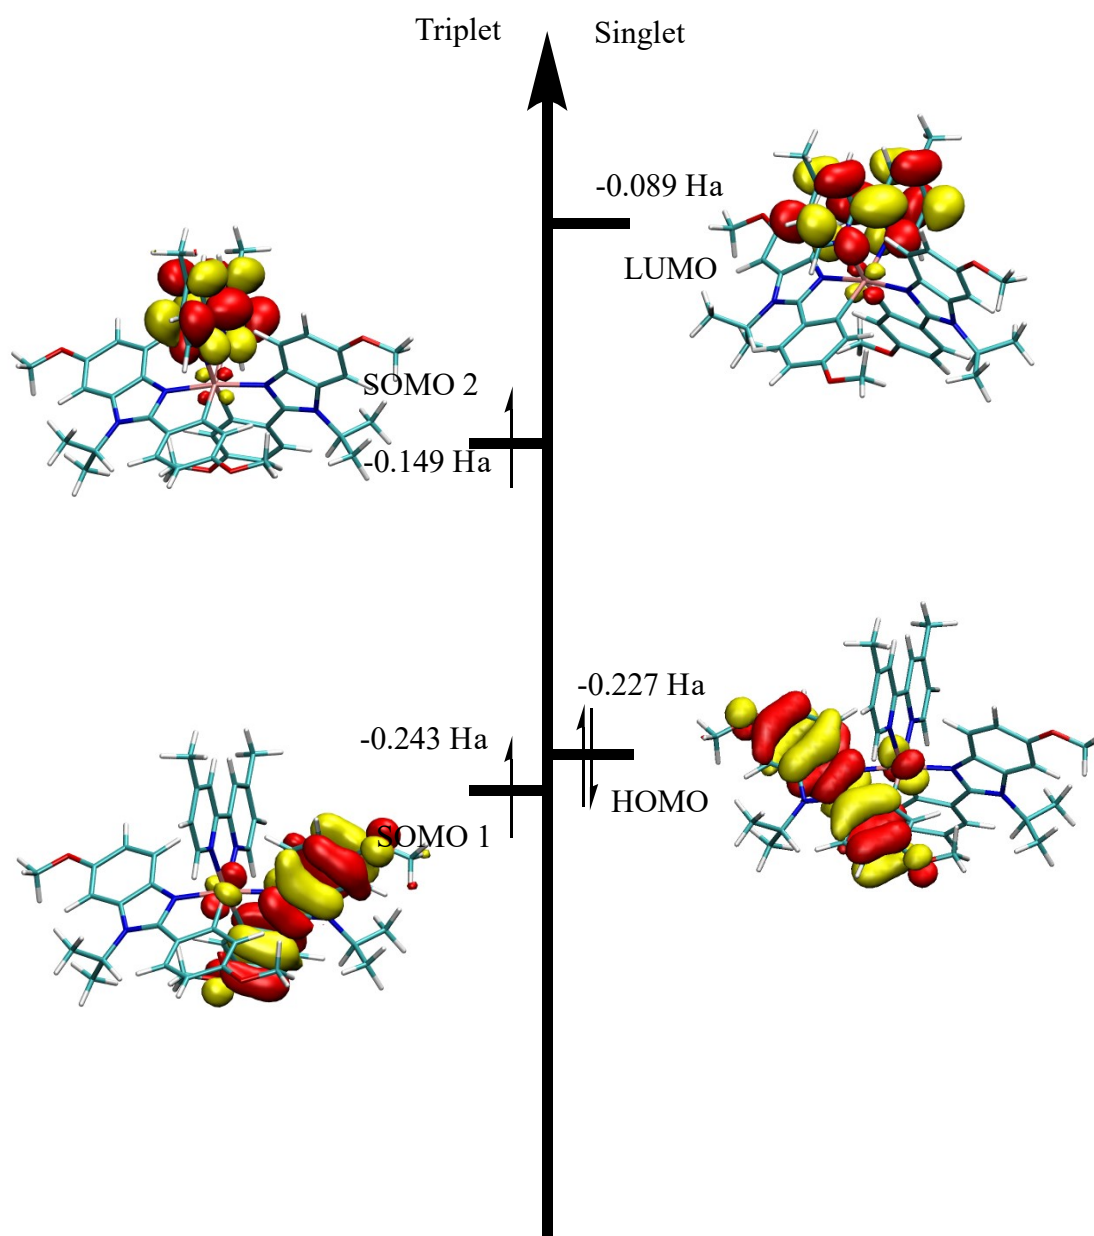

Figure S 12: Frontier orbitals of Complex A in  $\text{CH}_2\text{Cl}_2$ : SOMO's of the triplet state (left) and HOMO/LUMO of the singlet state (right).

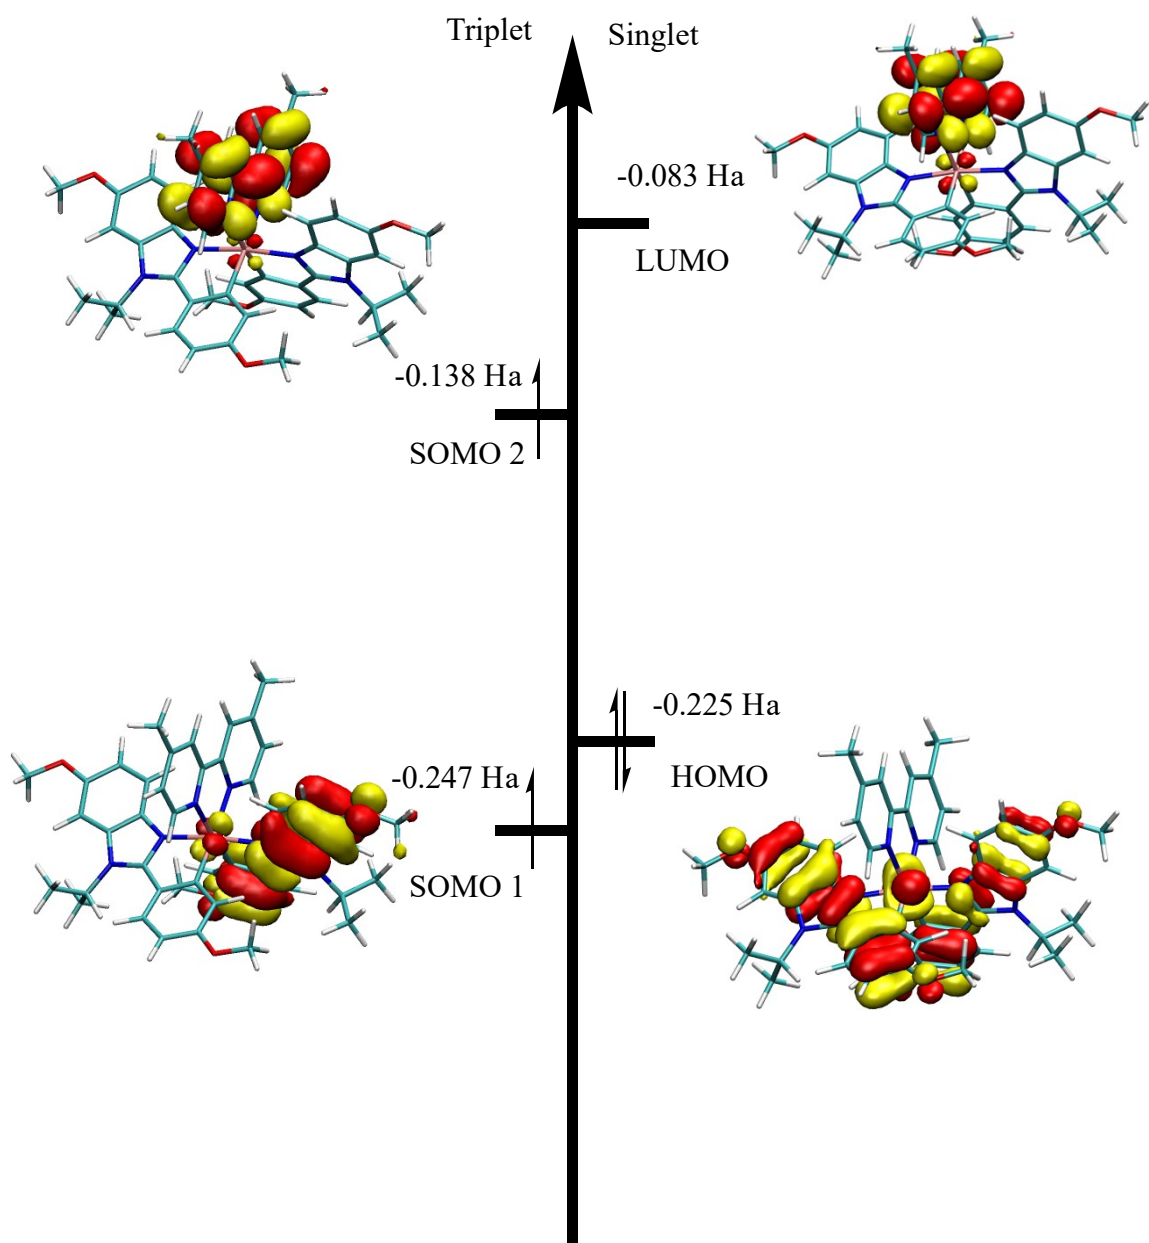

Figure S 13: Frontier orbitals of Complex A in the crystal: SOMO's of the triplet state (left) and HOMO/LUMO of the singlet state(right).



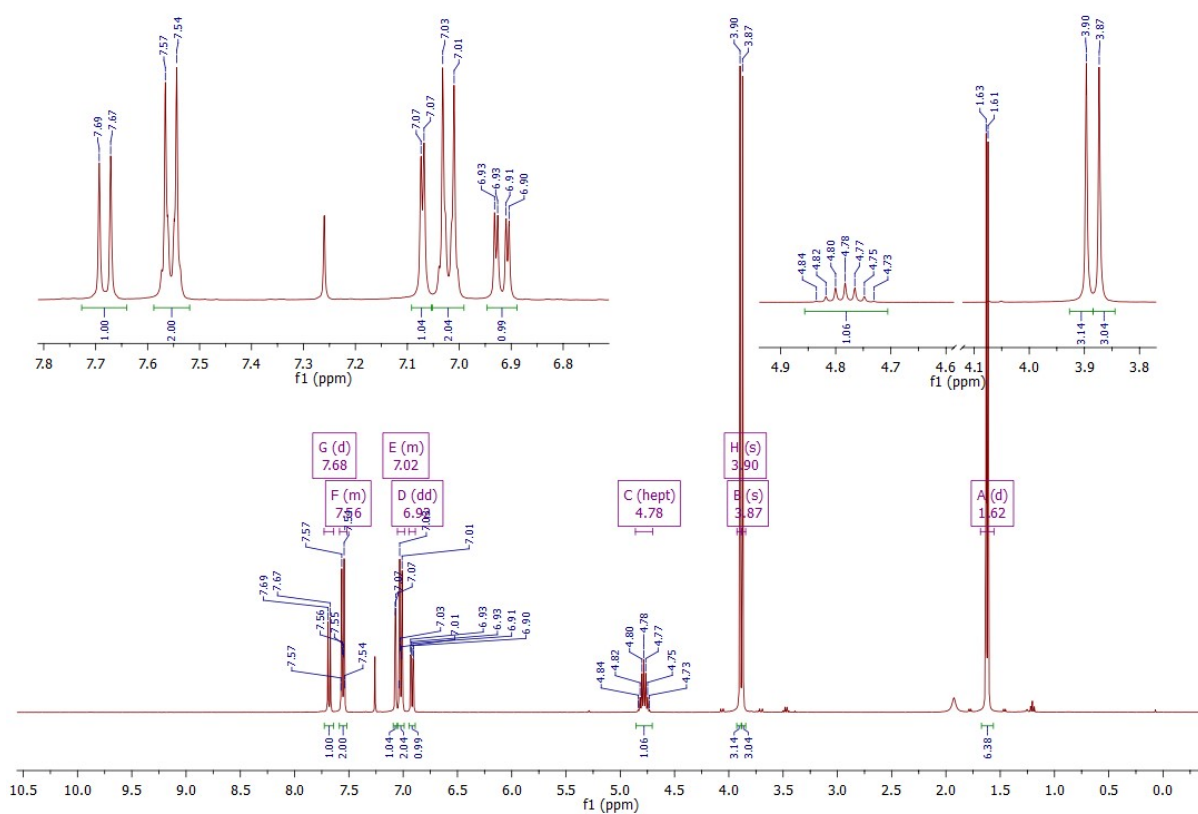

Figure S 14:  $^1\text{H}$  NMR spectra of the cyclometallating ligand 400 MHz in  $\text{CDCl}_3$

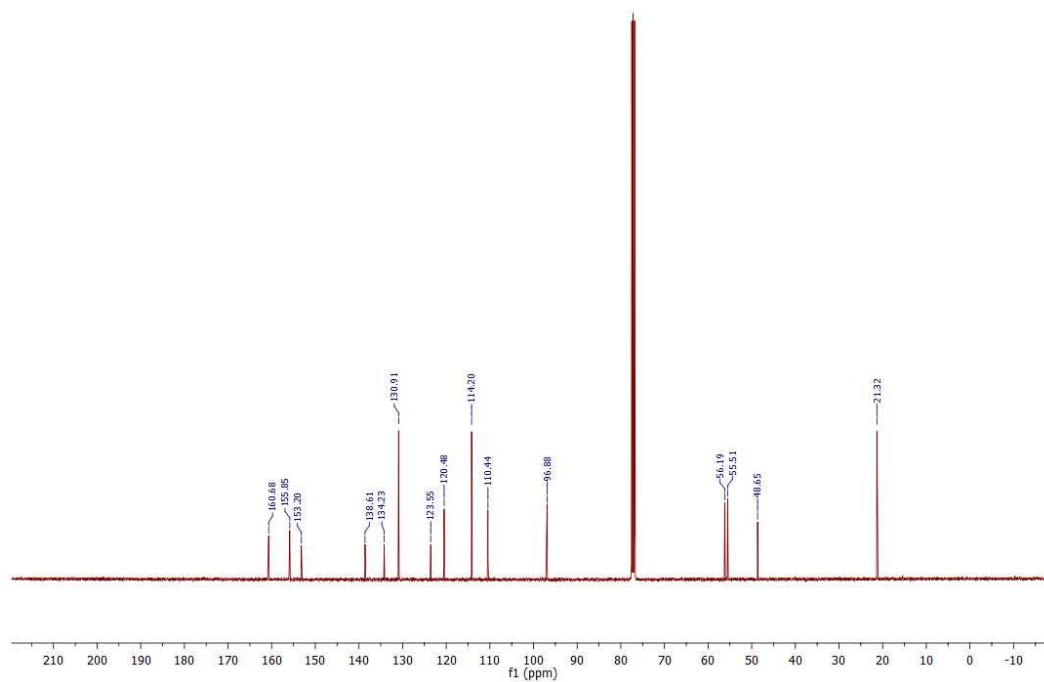

Figure S 15:  $^{13}\text{C}$  NMR spectra of the cyclometallating ligand 101 MHz in  $\text{CDCl}_3$ .

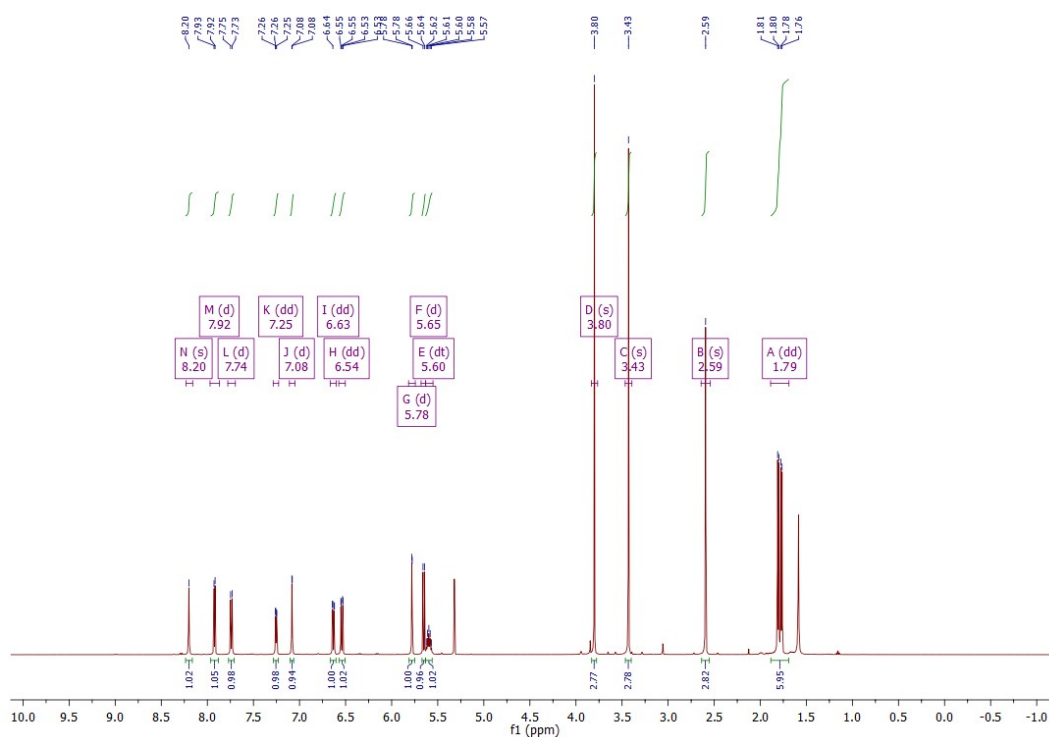

Figure S 16:  $^1\text{H}$  NMR spectra of complex A 500 MHz in  $\text{CD}_2\text{Cl}_2$ .

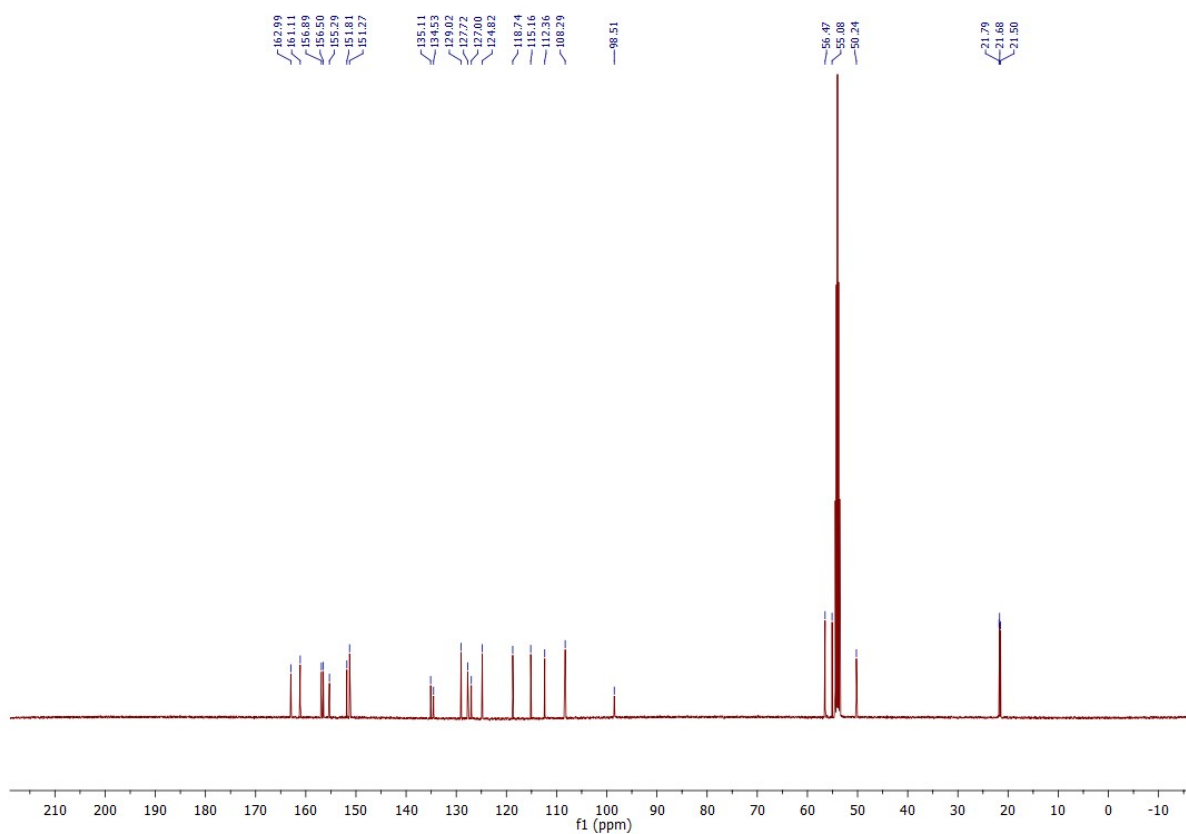

Figure S 17:  $^{13}\text{C}$  NMR spectra of complex A, 126 MHz in  $\text{CD}_2\text{Cl}_2$ .

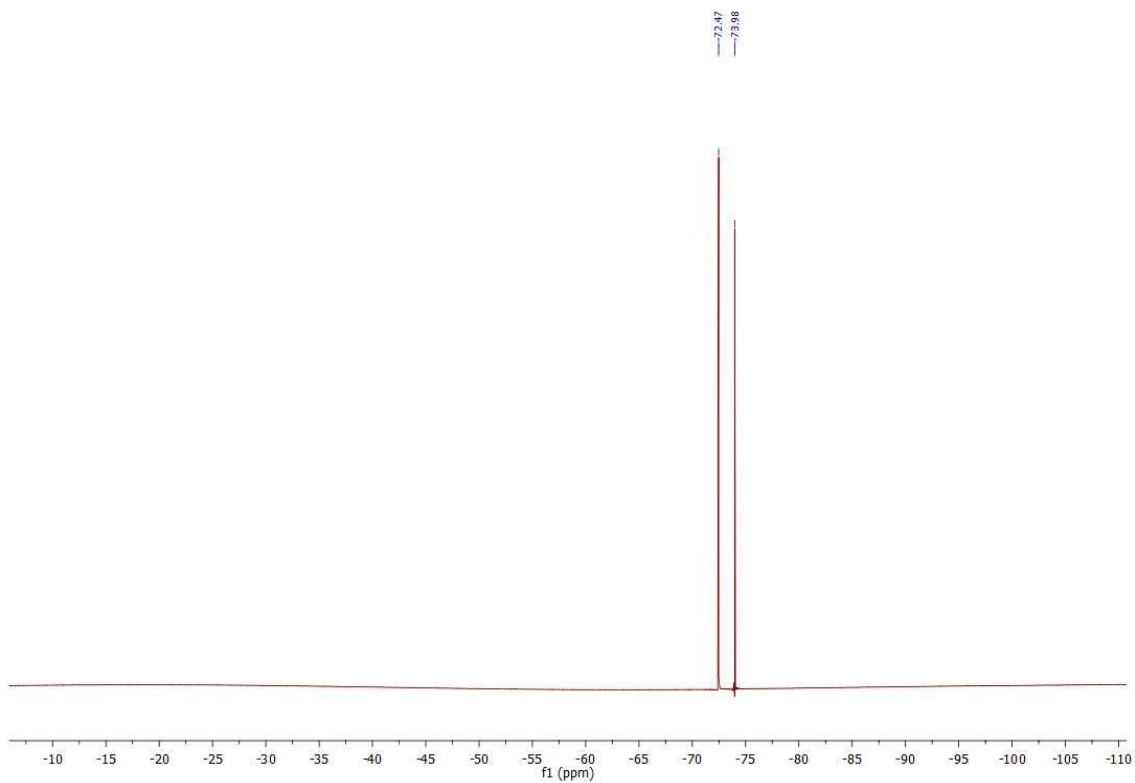

Figure S 18 :  $^{19}\text{F}$  NMR spectra of complex A 470 MHz in  $\text{CD}_2\text{Cl}_2$

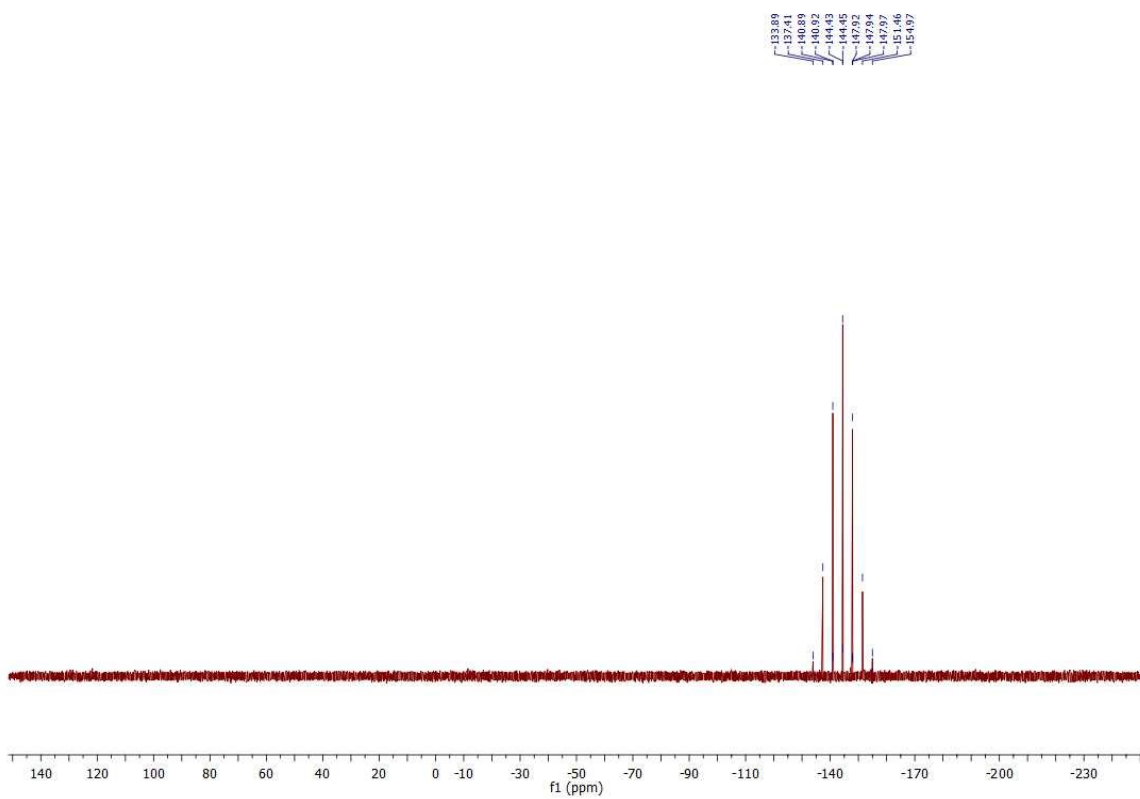

Figure S 19:  $^{31}\text{P}$  NMR spectra of complex A 202 MHz in  $\text{CD}_2\text{Cl}_2$

## References

- 1 O. V. Dolomanov, L. J. Bourhis, R. J. Gildea, J. A. K. K. Howard and H. Puschmann, *J. Appl. Crystallogr.*, 2009, **42**, 339–341.
- 2 M. Nonoyama, *Bull. Chem. Soc. Jpn.*, 1974, **47**, 767.
